# Supplementary material for: Proximity to a Major Road and Plasma Cytokines in School-Aged Children
Source: PubMed Central journal article supplement — Pediatr Allergy Immunol Pulmonol. 2016 Sep 1;29(3):111–7. doi: 10.1089/ped.2016.0649 (PMC5314728; doi:10.1089/ped.2016.0649), 2016-09-01
Supplement: Supp_Figure1.pdf [file Supp_Figure1.pdf]

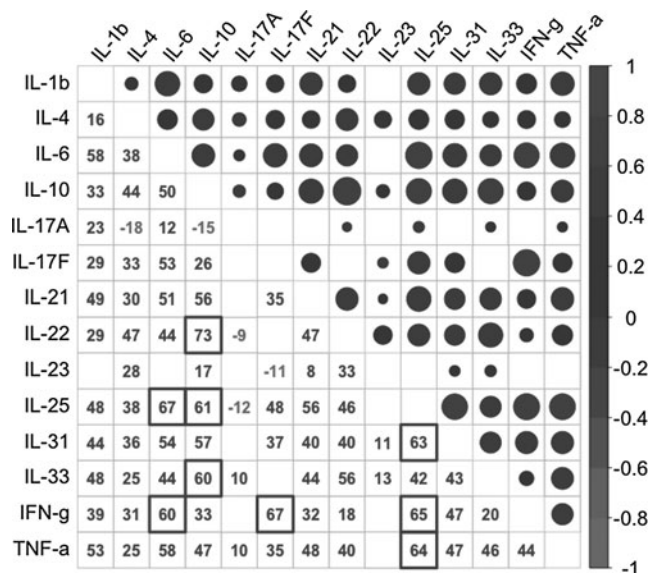

**SUPPLEMENTARY FIG. S1.** Pairwise correlation matrix for plasma cytokines. The *upper right triangle* shows a heat map for pairwise Pearson correlations; *circle area* is proportional to the correlation coefficient. *Lower left triangle* shows the correlation coefficients as a percentage (eg,  $r=0.60$  shown as 60); positive correlations in *blue*, negative in *red*. Only significant correlations ( $P<0.05$ ) are shown. *Boxes* mark the 9 strong pairwise correlations ( $r>0.60$ ).
