# Supplementary material for: Proximity to a Major Road and Plasma Cytokines in School-Aged Children
Source: PubMed Central journal article supplement — Pediatr Allergy Immunol Pulmonol. 2016 Sep 1;29(3):111–7. doi: 10.1089/ped.2016.0649 (PMC5314728; doi:10.1089/ped.2016.0649), 2016-09-01
Supplement: Supp_Table1.pdf [file Supp_Table1.pdf]

## Supplementary Data

SUPPLEMENTARY TABLE S1. LOWEST LIMIT  
OF DETECTION OF THE ASSAYS USED  
TO MEASURE THE STUDY CYTOKINES

| <i>Cytokine</i> | <i>Lowest limit of detection (pg/mL)</i> |
|-----------------|------------------------------------------|
| IL-1 $\beta$    | 0.02                                     |
| IL-4            | 0.52                                     |
| IL-6            | 0.67                                     |
| IL-10           | 0.3                                      |
| IL-17A          | 0.49                                     |
| IL-17F          | 0.8                                      |
| IL-21           | 2.13                                     |
| IL-22           | 0.03                                     |
| IL-23           | 1.55                                     |
| IL-25           | 0.07                                     |
| IL-31           | 0.49                                     |
| IL-33           | 0.58                                     |
| IFN- $\gamma$   | 0.43                                     |
| TNF- $\alpha$   | 0.07                                     |

IFN- $\gamma$ , interferon gamma; IL, interleukin; TNF- $\alpha$ , tumor necrosis factor alpha.
