# Supplementary material for: Proximity to a Major Road and Plasma Cytokines in School-Aged Children
Source: PubMed Central journal article supplement — Pediatr Allergy Immunol Pulmonol. 2016 Sep 1;29(3):111–7. doi: 10.1089/ped.2016.0649 (PMC5314728; doi:10.1089/ped.2016.0649), 2016-09-01
Supplement: Supp_Table2.pdf [file Supp_Table2.pdf]

SUPPLEMENTARY TABLE S2. PEARSON CORRELATION COEFFICIENTS AMONG LOG-TRANSFORMED PLASMA CYTOKINES IN STUDY PARTICIPANTS (N=577)

|               | <i>IL 1<math>\beta</math></i> | <i>IL 4</i> | <i>IL 6</i> | <i>IL 10</i> | <i>IL 17A</i> | <i>IL 17F</i> | <i>IL 21</i> | <i>IL 22</i> | <i>IL 23</i> | <i>IL 25</i> | <i>IL 31</i> | <i>IL 33</i> | <i>INF-<math>\gamma</math></i> | <i>TNF-<math>\alpha</math></i> |
|---------------|-------------------------------|-------------|-------------|--------------|---------------|---------------|--------------|--------------|--------------|--------------|--------------|--------------|--------------------------------|--------------------------------|
| IL 1 $\beta$  | 1                             | 0.163       | 0.579       | 0.329        | 0.230         | 0.293         | 0.486        | 0.292        | -0.041       | 0.477        | 0.437        | 0.479        | 0.386                          | 0.527                          |
|               |                               | <0.001      | <0.001      | <0.001       | <0.001        | <0.001        | <0.001       | <0.001       | 0.328        | <0.001       | <0.001       | <0.001       | <0.001                         | <0.001                         |
| IL 4          |                               | 1           | 0.381       | 0.437        | -0.182        | 0.326         | 0.299        | 0.467        | 0.283        | 0.380        | 0.359        | 0.248        | 0.312                          | 0.245                          |
|               |                               |             | <0.001      | <0.001       | <0.001        | <0.001        | <0.001       | <0.001       | <0.001       | <0.001       | <0.001       | <0.001       | <0.001                         | <0.001                         |
| IL 6          |                               |             | 1           | 0.496        | 0.122         | 0.534         | 0.507        | 0.440        | 0.075        | <b>0.666</b> | 0.538        | 0.440        | <b>0.602</b>                   | 0.583                          |
|               |                               |             |             | <0.001       | 0.003         | <0.001        | <0.001       | <0.001       | 0.072        | <0.0001      | <0.001       | <0.001       | <0.0001                        | <0.001                         |
| IL 10         |                               |             |             | 1            | -0.152        | 0.263         | 0.564        | <b>0.731</b> | 0.174        | <b>0.605</b> | 0.567        | <b>0.605</b> | 0.327                          | 0.472                          |
|               |                               |             |             |              | <0.001        | <0.001        | <0.001       | <0.001       | <0.001       | <0.001       | <0.001       | <0.001       | <0.001                         | <0.001                         |
| IL 17A        |                               |             |             |              | 1             | 0.012         | -0.028       | -0.087       | 0.050        | -0.123       | -0.030       | 0.102        | -0.072                         | 0.103                          |
|               |                               |             |             |              |               | 0.777         | 0.499        | 0.036        | 0.226        | 0.003        | 0.478        | 0.015        | 0.085                          | 0.014                          |
| IL 17F        |                               |             |             |              |               | 1             | 0.351        | 0.036        | -0.112       | 0.479        | 0.372        | 0.023        | <b>0.667</b>                   | 0.352                          |
|               |                               |             |             |              |               |               | <0.001       | 0.385        | 0.007        | <0.001       | <0.001       | 0.584        | <0.001                         | <0.001                         |
| IL 21         |                               |             |             |              |               |               | 1            | 0.468        | 0.085        | 0.558        | 0.402        | 0.438        | 0.322                          | 0.480                          |
|               |                               |             |             |              |               |               |              | <0.001       | 0.041        | <0.001       | <0.001       | <0.001       | <0.001                         | <0.001                         |
| IL 22         |                               |             |             |              |               |               |              | 1            | 0.334        | 0.462        | 0.403        | 0.564        | 0.181                          | 0.398                          |
|               |                               |             |             |              |               |               |              |              | <0.001       | <0.001       | <0.001       | <0.001       | <0.001                         | <0.001                         |
| IL 23         |                               |             |             |              |               |               |              |              | 1            | 0.067        | 0.113        | 0.130        | -0.022                         | 0.025                          |
|               |                               |             |             |              |               |               |              |              |              | 0.108        | 0.006        | 0.002        | 0.598                          | 0.547                          |
| IL 25         |                               |             |             |              |               |               |              |              |              | 1            | <b>0.625</b> | 0.425        | <b>0.648</b>                   | <b>0.637</b>                   |
|               |                               |             |             |              |               |               |              |              |              |              | <0.001       | <0.001       | <0.001                         | <0.001                         |
| IL 31         |                               |             |             |              |               |               |              |              |              |              | 1            | 0.426        | 0.473                          | 0.474                          |
|               |                               |             |             |              |               |               |              |              |              |              |              | <0.001       | <0.001                         | <0.001                         |
| IL 33         |                               |             |             |              |               |               |              |              |              |              |              | 1            | 0.203                          | 0.463                          |
|               |                               |             |             |              |               |               |              |              |              |              |              |              | <0.001                         | <0.001                         |
| INF- $\gamma$ |                               |             |             |              |               |               |              |              |              |              |              |              | 1                              | 0.436                          |
|               |                               |             |             |              |               |               |              |              |              |              |              |              |                                | <0.001                         |
| TNF- $\alpha$ |                               |             |             |              |               |               |              |              |              |              |              |              |                                | 1                              |

Bold indicates a pearson R coefficient at >0.60, considered to be a strong pairwise correlation.
