# Supplementary material for: Proximity to a Major Road and Plasma Cytokines in School-Aged Children
Source: PubMed Central journal article supplement — Pediatr Allergy Immunol Pulmonol. 2016 Sep 1;29(3):111–7. doi: 10.1089/ped.2016.0649 (PMC5314728; doi:10.1089/ped.2016.0649), 2016-09-01
Supplement: Supp_Table3.pdf [file Supp_Table3.pdf]

SUPPLEMENTARY TABLE S3. PLASMA CYTOKINE LEVELS IN CHILDREN WITH AND WITHOUT ASTHMA

| <i>Log10 of selected cytokines</i> | <i>Controls (n=283)</i> | <i>Asthma (n=294)</i> | <i>P</i>     |
|------------------------------------|-------------------------|-----------------------|--------------|
| IL 1 $\beta$                       | -0.07 (0.50)            | -0.22 (0.59)          | <b>0.001</b> |
| IL 4                               | 0.51 (0.94)             | 0.55 (0.95)           | 0.56         |
| IL 6                               | 0.78 (0.52)             | 0.75 (0.58)           | 0.56         |
| IL 10                              | 0.63 (0.99)             | 0.51 (1.03)           | 0.13         |
| IL 17A                             | 0.68 (0.86)             | 0.57 (0.84)           | 0.11         |
| IL 17F                             | 0.84 (1.06)             | 1.06 (1.05)           | <b>0.01</b>  |
| IL 21                              | 0.62 (0.77)             | 0.52 (0.73)           | 0.12         |
| IL 22                              | 0.46 (0.89)             | 0.25 (0.97)           | <b>0.006</b> |
| IL 23                              | 0.05 (0.51)             | 0.10 (0.59)           | 0.23         |
| IL 25                              | 0.63 (0.41)             | 0.62 (0.39)           | 0.83         |
| IL 31                              | 1.34 (0.88)             | 1.22 (0.98)           | 0.11         |
| IL 33                              | 1.76 (0.57)             | 1.59 (0.78)           | <b>0.003</b> |
| IFN $\gamma$                       | 0.69 (1.08)             | 0.86 (1.14)           | 0.07         |
| TNF $\alpha$                       | 0.84 (0.27)             | 0.82 (0.20)           | 0.48         |

Bold indicates statistical significance at alpha level 0.05.  
 Results displayed as mean (SD).
